# Supplementary material for: Versatile synthesis of sub-10 nm sized metal-doped MxCo3−xO4 nanoparticles and their electrocatalytic OER activity
Source: Royal Society of Chemistry journal article supplement (doi:10.1039/d4ma00088a), 2024-01-01
Supplement: d4ma00088a1.pdf [file d4ma00088a1.pdf]

## Supporting Information

### **Versatile synthesis of sub 10 nm sized metal-doped $M_xCo_{3-x}O_4$ nanoparticles and their electrocatalytic OER activity**

*Carsten Placke-Yan,<sup>a</sup> Georg Bendt,<sup>a</sup> Soma Salamon (ORCID 0000-0002-8661-6038),<sup>b</sup> Joachim Landers (ORCID 0000-0002-4506-6383),<sup>b</sup> Heiko Wende (ORCID ID: 0000-0001-8395-3541),<sup>b</sup> Ulrich Hagemann,<sup>c</sup> and Stephan Schulz<sup>\*a,c</sup> (ORCID ID: 0000-0003-2896-4488)*

<sup>a</sup> Institute for Inorganic Chemistry, Universitätsstraße 5-7, D-45141 Essen, Germany. E-mail: Stephan.schulz@uni-due.de

<sup>b</sup> Faculty of Physics and Center for Nanointegration Duisburg-Essen (CENIDE), University of Duisburg-Essen, Lotharstr. 1, D-47057 Duisburg, Germany

<sup>c</sup> Center for Nanointegration Duisburg-Essen (CENIDE), University of Duisburg-Essen, Carl-Benz-Straße 199, 47057 Duisburg, Germany

## Content

### I. Sample Preparation and Characterization

**Table S1.** Overview of Sample Characterization (TEM and electrocatalytic activity parameters)

**Table S2.** Weights for the different doped and undoped nanoparticle samples.

### II. PXRD characterization

**Figure S1.** PXRD measurements of S:Al005, S:Al01, S:Al02, S:0 and S:0c.

**Figure S2.** PXRD measurements of doped nanoparticles.

### III. XPS measurements

**Figure S3.** XPS measurements of S:0 (a) and S:0c (b). Inset: Magnification of Co 2p.

### IV. FT-IR spectroscopy

**Figure S4.** FT-IR measurements of uncalcinated samples S:0, S:Al005, S:Al01 and S:Al02 compared to oleylamine.

**Figure S5.** FT-IR measurements of calcinated nanoparticles S:0c, S:Al005c, S:Al01c and S:Al02c.

### V. TEM Characterization

**Figure S6-S12.** TEM image and particle size distribution of metal-doped  $\text{Co}_3\text{O}_4$  nanoparticles.

### VI. EDX Characterization

**Table S3.** Metal concentration within the  $\text{M}_{0.05}\text{Co}_{2.95}\text{O}_4$ ,  $\text{M}_{0.1}\text{Co}_{2.9}\text{O}_4$  and  $\text{M}_{0.2}\text{Co}_{2.8}\text{O}_4$  (M = Al, V, Cr, Mn, Fe, Ni) nanoparticle series determined by SEM-EDX bulk measurements.

**Figure S13-18.** TEM-EDX Mapping of the M-doped nanoparticle sample M02.

### VII. Mössbauer spectroscopy

**Figure S19.** Mössbauer spectra of Fe-doped nanoparticles recorded between 5 and 300 K.

### VIII. Electrochemical Characterization

**Figure S20.** Electrochemical characterization of doped nanoparticles in comparison with pristine  $\text{Co}_3\text{O}_4$  consisting of LSV measurements, Tafel slope and EIS measurements.

### IX. References

## I. Sample Preparation and Characterization

**Table S1.** Overview of Sample Characterization (TEM size and electrocatalytic activity parameters)

| Sample   | Stoichiometry                                        | Size (TEM) [nm] | Overpotential [mV] | Tafel slope [mV dec <sup>-1</sup> ] |
|----------|------------------------------------------------------|-----------------|--------------------|-------------------------------------|
| S:0c     | Co <sub>3</sub> O <sub>4</sub>                       | 8.9 ± 2.4       | 471 ± 7            | 52.3                                |
| S:Al005c | Al <sub>0.05</sub> Co <sub>2.95</sub> O <sub>4</sub> | 8.3 ± 1.9       | 483 ± 1            | 57.8                                |
| S:Al01c  | Al <sub>0.1</sub> Co <sub>2.9</sub> O <sub>4</sub>   | 8.9 ± 1.9       | 492 ± 1            | 59.8                                |
| S:Al02c  | Al <sub>0.2</sub> Co <sub>2.8</sub> O <sub>4</sub>   | 9.1 ± 2.6       | 502 ± 6            | 59.9                                |
| S:V005c  | V <sub>0.05</sub> Co <sub>2.95</sub> O <sub>4</sub>  | 9.3 ± 2.3       | 464 ± 4            | 51.7                                |
| S:V01c   | V <sub>0.1</sub> Co <sub>2.9</sub> O <sub>4</sub>    | 8.6 ± 1.9       | 453 ± 3            | 50.7                                |
| S:V02c   | V <sub>0.2</sub> Co <sub>2.8</sub> O <sub>4</sub>    | 8.1 ± 2.2       | 441 ± 3            | 52.8                                |
| S:Cr005c | Cr <sub>0.05</sub> Co <sub>2.95</sub> O <sub>4</sub> | 7.9 ± 1.9       | 464 ± 4            | 54.1                                |
| S:Cr01c  | Cr <sub>0.1</sub> Co <sub>2.9</sub> O <sub>4</sub>   | 9.2 ± 2.2       | 457 ± 3            | 52.6                                |
| S:Cr02c  | Cr <sub>0.2</sub> Co <sub>2.8</sub> O <sub>4</sub>   | 9.1 ± 2.4       | 438 ± 5            | 49.2                                |
| S:Mn005c | Mn <sub>0.05</sub> Co <sub>2.95</sub> O <sub>4</sub> | 8.0 ± 2.0       | 472 ± 4            | 43.1                                |
| S:Mn01c  | Mn <sub>0.1</sub> Co <sub>2.9</sub> O <sub>4</sub>   | 7.5 ± 2.0       | 485 ± 5            | 50.1                                |
| S:Mn02c  | Mn <sub>0.2</sub> Co <sub>2.8</sub> O <sub>4</sub>   | 8.2 ± 2.7       | 490 ± 10           | 53.6                                |
| S:Fe005c | Fe <sub>0.05</sub> Co <sub>2.95</sub> O <sub>4</sub> | 7.3 ± 2.4       | 474 ± 9            | 50.3                                |
| S:Fe01c  | Fe <sub>0.1</sub> Co <sub>2.9</sub> O <sub>4</sub>   | 7.7 ± 2.2       | 460 ± 6            | 54.0                                |
| S:Fe02c  | Fe <sub>0.2</sub> Co <sub>2.8</sub> O <sub>4</sub>   | 8.0 ± 2.9       | 445 ± 11           | 49.6                                |
| S:Ni005c | Ni <sub>0.05</sub> Co <sub>2.95</sub> O <sub>4</sub> | 9.0 ± 1.7       | 476 ± 7            | 50.5                                |
| S:Ni01c  | Ni <sub>0.1</sub> Co <sub>2.9</sub> O <sub>4</sub>   | 8.6 ± 2.8       | 469 ± 3            | 49.0                                |
| S:Ni02c  | Ni <sub>0.2</sub> Co <sub>2.8</sub> O <sub>4</sub>   | 9.6 ± 2.9       | 461 ± 6            | 46.4                                |

**Table S2.** Amounts for the different doped and undoped nanoparticle samples.

| Sample   | Stoichiometry                                        | n(Co(acac) <sub>2</sub> ) [mmol] | m(Co(acac) <sub>2</sub> ) [g] | Dopant-Source                                         | n(Dopant) [mmol] | m(Dopant) [mg] |
|----------|------------------------------------------------------|----------------------------------|-------------------------------|-------------------------------------------------------|------------------|----------------|
| S:0c     | Co <sub>3</sub> O <sub>4</sub>                       | 7.500                            | 1.928                         | -                                                     | -                | -              |
| S:Al005c | Al <sub>0.05</sub> Co <sub>2.95</sub> O <sub>4</sub> | 7.375                            | 1.896                         | Al(acac) <sub>3</sub>                                 | 0.125            | 40.5           |
| S:Al01c  | Al <sub>0.1</sub> Co <sub>2.9</sub> O <sub>4</sub>   | 7.250                            | 1.860                         | Al(acac) <sub>3</sub>                                 | 0.250            | 81.1           |
| S:Al02c  | Al <sub>0.2</sub> Co <sub>2.8</sub> O <sub>4</sub>   | 7.000                            | 1.800                         | Al(acac) <sub>3</sub>                                 | 0.500            | 162.2          |
| S:V005c  | V <sub>0.05</sub> Co <sub>2.95</sub> O <sub>4</sub>  | 7.375                            | 1.896                         | V(acac) <sub>3</sub>                                  | 0.125            | 43.5           |
| S:V01c   | V <sub>0.1</sub> Co <sub>2.9</sub> O <sub>4</sub>    | 7.250                            | 1.860                         | V(acac) <sub>3</sub>                                  | 0.250            | 87.1           |
| S:V02c   | V <sub>0.2</sub> Co <sub>2.8</sub> O <sub>4</sub>    | 7.000                            | 1.800                         | V(acac) <sub>3</sub>                                  | 0.500            | 174.1          |
| S:Cr005c | Cr <sub>0.05</sub> Co <sub>2.95</sub> O <sub>4</sub> | 7.375                            | 1.896                         | Cr(NO <sub>3</sub> ) <sub>3</sub> · 9H <sub>2</sub> O | 0.125            | 50.0           |
| S:Cr01c  | Cr <sub>0.1</sub> Co <sub>2.9</sub> O <sub>4</sub>   | 7.250                            | 1.860                         | Cr(NO <sub>3</sub> ) <sub>3</sub> · 9H <sub>2</sub> O | 0.250            | 100.1          |
| S:Cr02c  | Cr <sub>0.2</sub> Co <sub>2.8</sub> O <sub>4</sub>   | 7.000                            | 1.800                         | Cr(NO <sub>3</sub> ) <sub>3</sub> · 9H <sub>2</sub> O | 0.500            | 200.1          |
| S:Mn005c | Mn <sub>0.05</sub> Co <sub>2.95</sub> O <sub>4</sub> | 7.375                            | 1.896                         | Mn(acac) <sub>2</sub>                                 | 0.125            | 31.6           |
| S:Mn01c  | Mn <sub>0.1</sub> Co <sub>2.9</sub> O <sub>4</sub>   | 7.250                            | 1.860                         | Mn(acac) <sub>2</sub>                                 | 0.250            | 63.3           |
| S:Mn02c  | Mn <sub>0.2</sub> Co <sub>2.8</sub> O <sub>4</sub>   | 7.000                            | 1.800                         | Mn(acac) <sub>2</sub>                                 | 0.500            | 126.6          |
| S:Fe005c | Fe <sub>0.05</sub> Co <sub>2.95</sub> O <sub>4</sub> | 7.375                            | 1.896                         | Fe(acac) <sub>3</sub>                                 | 0.125            | 44.1           |
| S:Fe01c  | Fe <sub>0.1</sub> Co <sub>2.9</sub> O <sub>4</sub>   | 7.250                            | 1.860                         | Fe(acac) <sub>3</sub>                                 | 0.250            | 88.3           |
| S:Fe02c  | Fe <sub>0.2</sub> Co <sub>2.8</sub> O <sub>4</sub>   | 7.000                            | 1.800                         | Fe(acac) <sub>3</sub>                                 | 0.500            | 176.6          |
| S:Ni005c | Ni <sub>0.05</sub> Co <sub>2.95</sub> O <sub>4</sub> | 7.375                            | 1.896                         | Ni(acac) <sub>2</sub>                                 | 0.125            | 32.1           |
| S:Ni01c  | Ni <sub>0.1</sub> Co <sub>2.9</sub> O <sub>4</sub>   | 7.250                            | 1.860                         | Ni(acac) <sub>2</sub>                                 | 0.250            | 64.2           |
| S:Ni02c  | Ni <sub>0.2</sub> Co <sub>2.8</sub> O <sub>4</sub>   | 7.000                            | 1.800                         | Ni(acac) <sub>2</sub>                                 | 0.500            | 128.5          |

## II. PXRD characterization

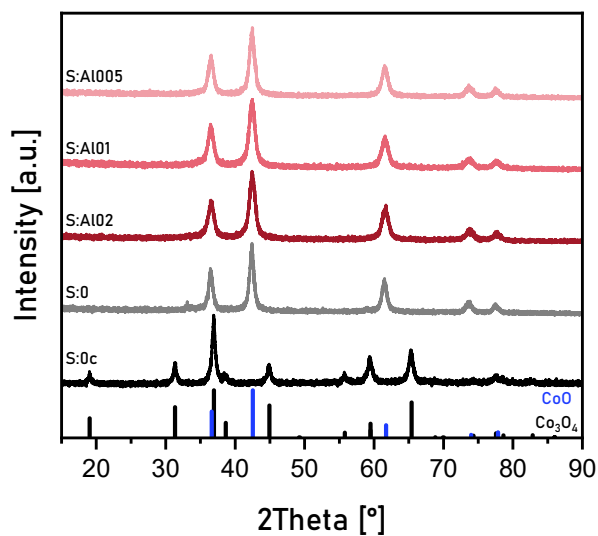

**Figure S1.** PXRD measurements of S:Al005, S:Al01, S:Al02, S:0 and S0c. Reference diffractograms for CoO (PDF 01-074-2391, blue) and Co<sub>3</sub>O<sub>4</sub> (PDF 01-076-1802, black).

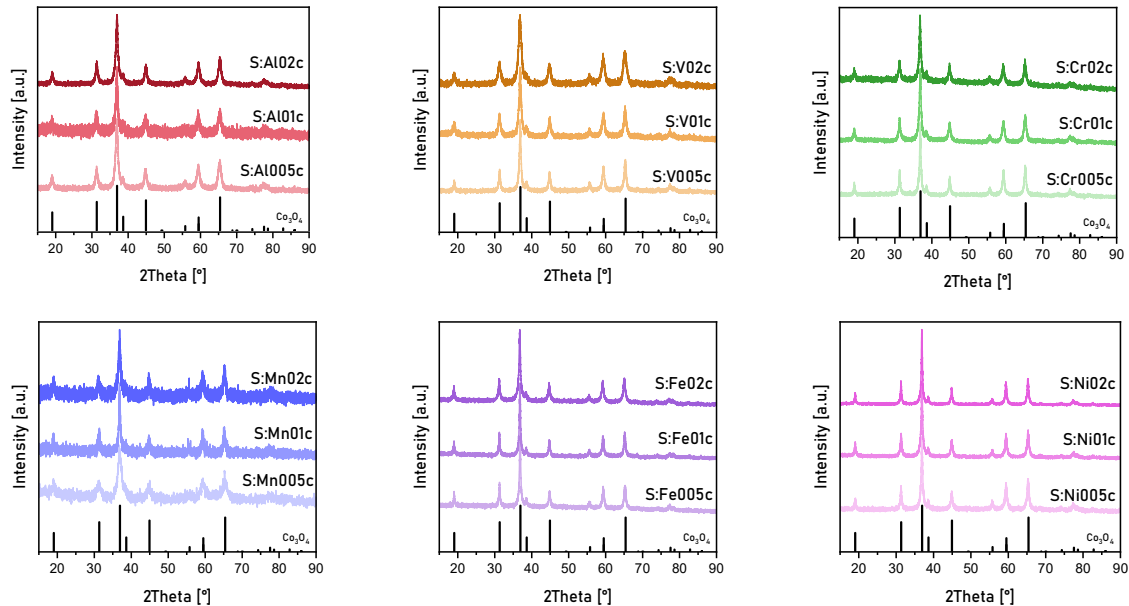

**Figure S2.** PXRD measurements of doped nanoparticles. Reference diffractogram for Co<sub>3</sub>O<sub>4</sub> (PDF 01-076-1802).

### III. XPS measurements

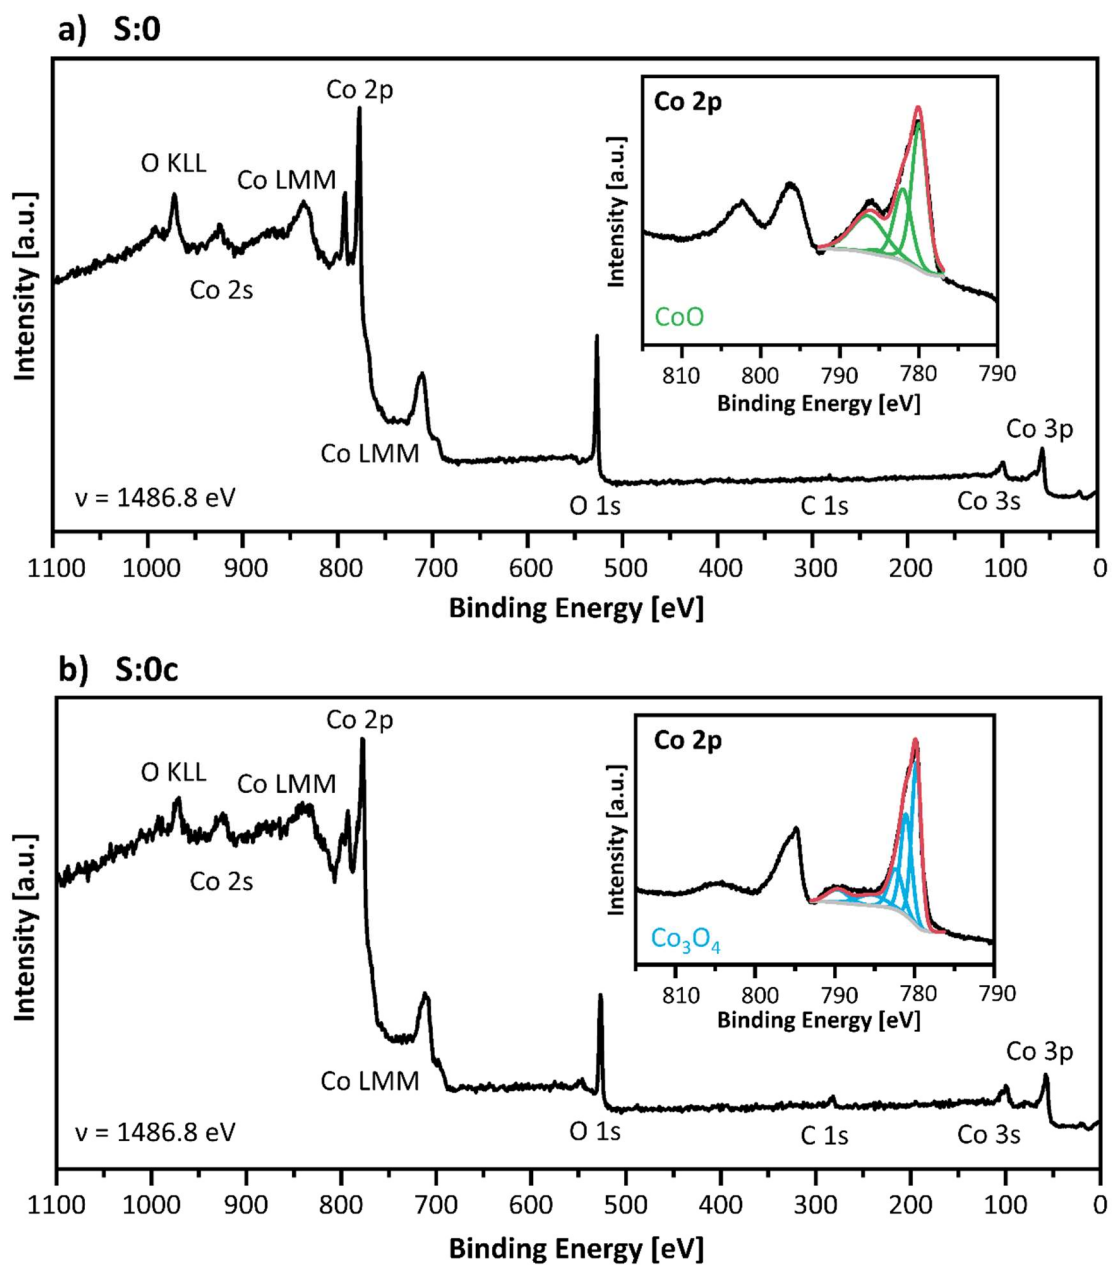

Figure S3. XPS measurements of S:0 (a) and S:0c (b). Inset: High resolution Co 2p spectra.

#### IV. FT-IR spectroscopy

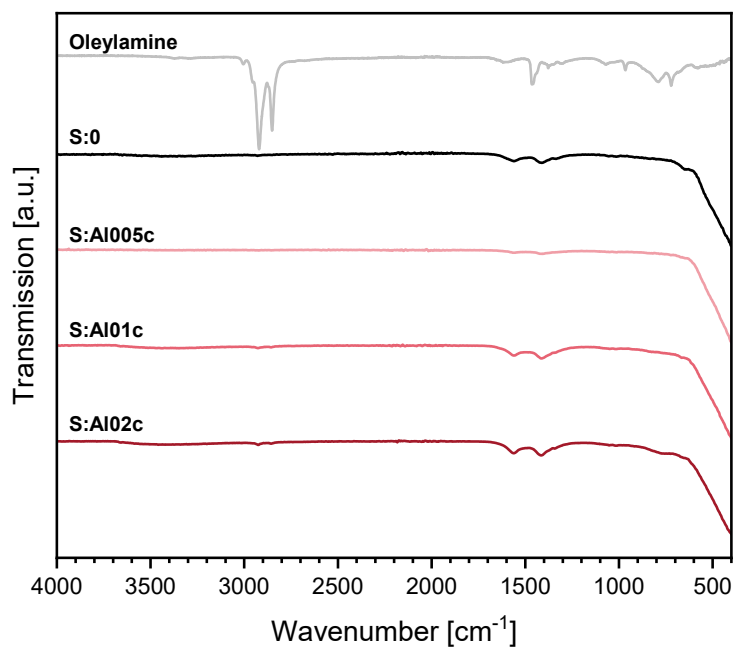

**Figure S4.** FT-IR measurements of uncalcinated samples S:0, S:Al005, S:Al01 and S:Al02 compared to oleylamine spectrum.

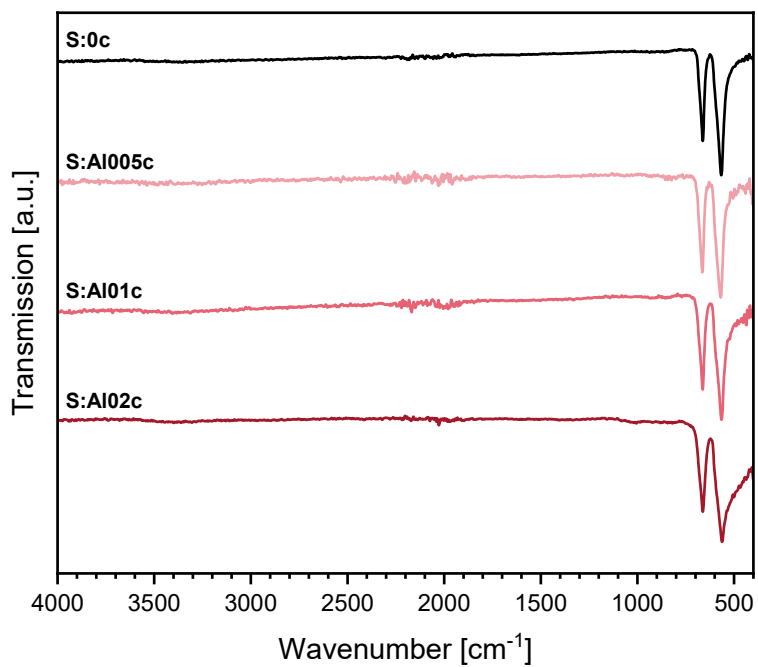

**Figure S5.** FT-IR measurements of calcinated nanoparticles S:0c, S:Al005c, S:Al01c and S:Al02c.

## V. TEM Characterization

S:0c

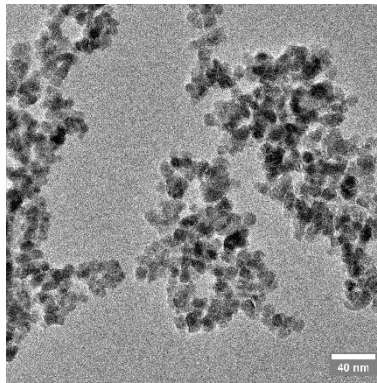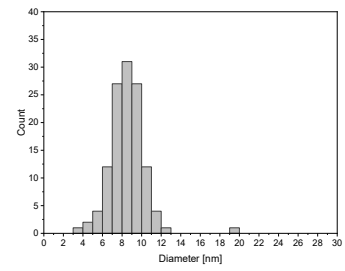

Figure S6. TEM image and particle size distribution of  $\text{Co}_3\text{O}_4$  nanoparticles S:0c.

S:Al005c

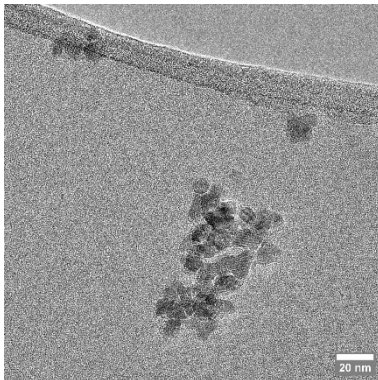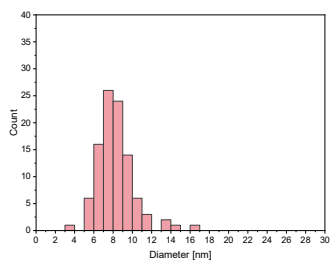

S:Al01c

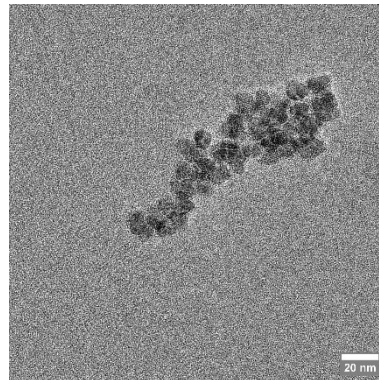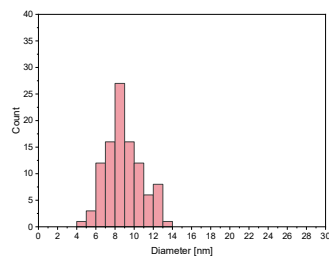

S:Al02c

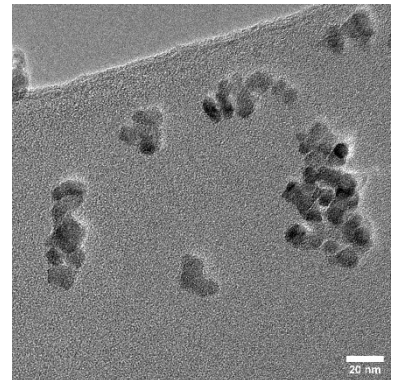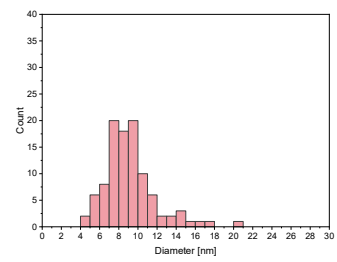

Figure S7. TEM images and particle size distribution of Al-doped  $\text{Co}_3\text{O}_4$  nanoparticles.



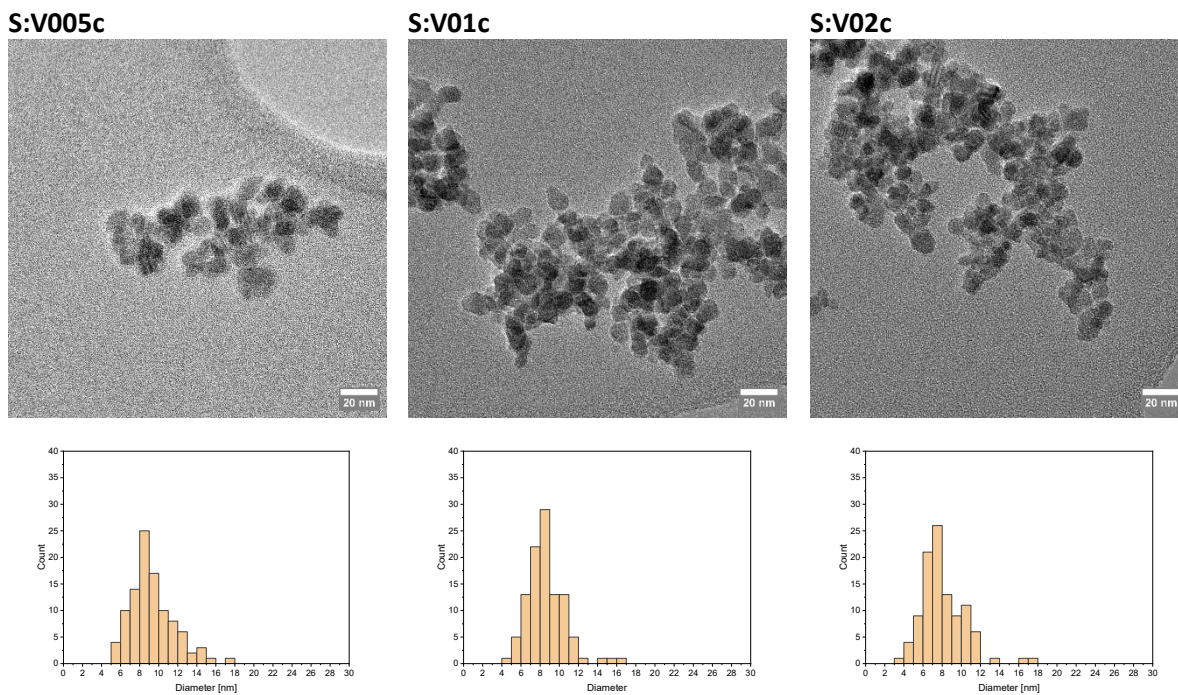

Figure S8. TEM images and particle size distribution of V-doped  $\text{Co}_3\text{O}_4$  nanoparticles.

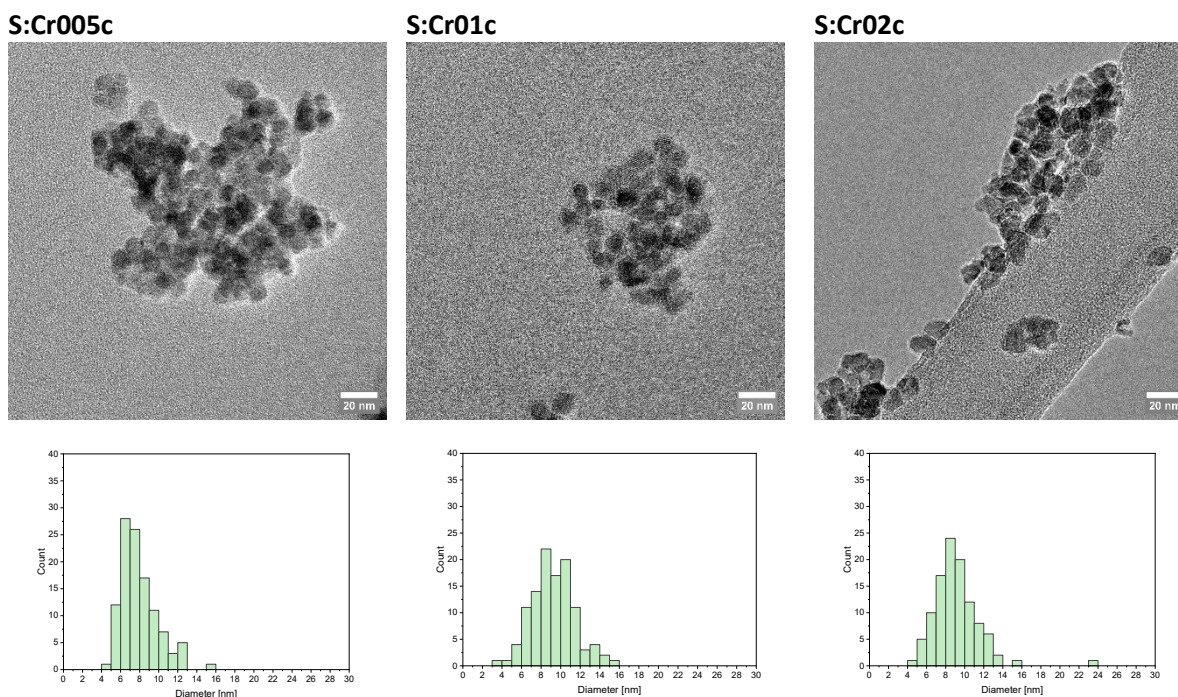

Figure S9. TEM images and particle size distribution of Cr-doped  $\text{Co}_3\text{O}_4$  nanoparticles.



**S:Mn005c**

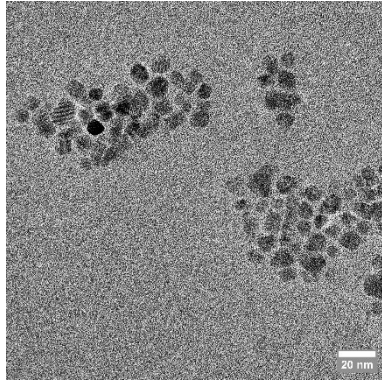

**S:Mn01c**

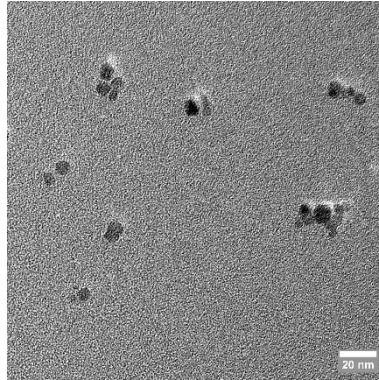

**S:Mn02c**

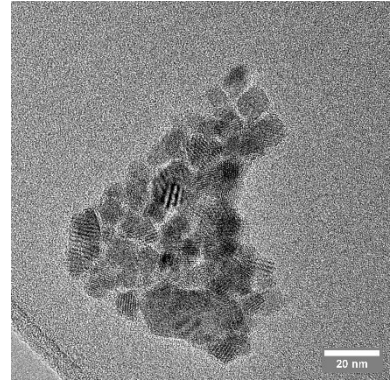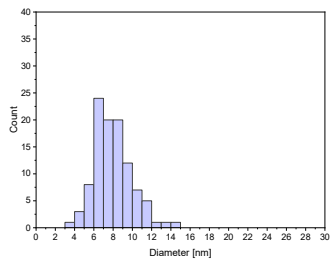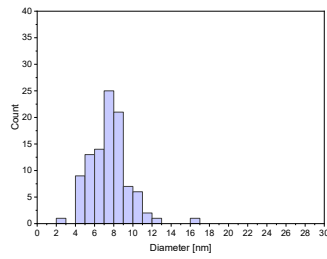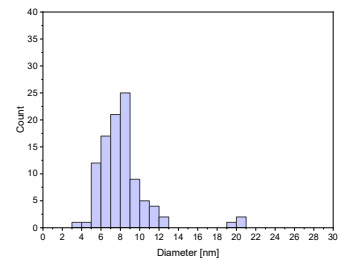

**Figure S10.** TEM images and particle size distribution of Mn-doped  $\text{Co}_3\text{O}_4$  nanoparticles.

**S:Fe005c**

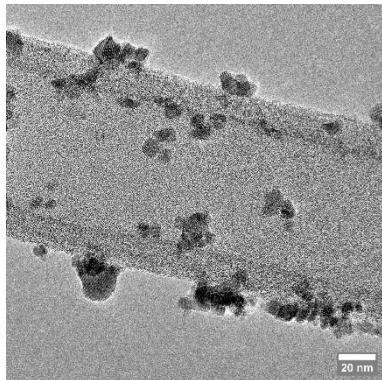

**S:Fe01c**

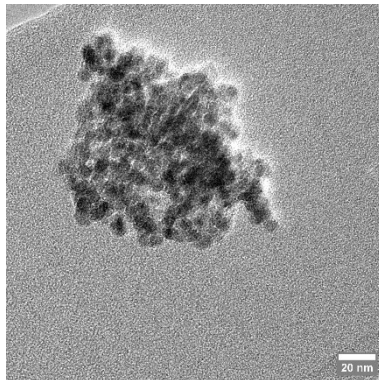

**S:Fe02c**

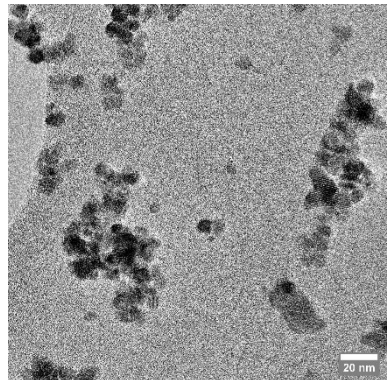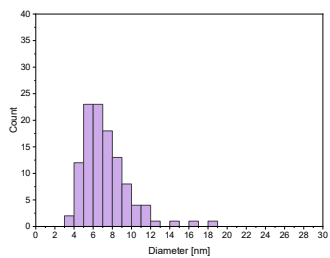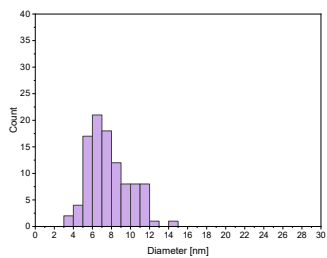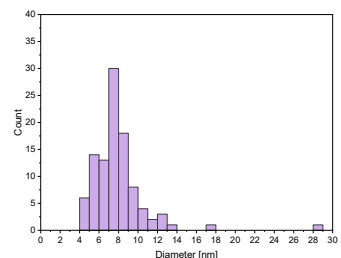

**Figure S11.** TEM images and particle size distribution of Fe-doped  $\text{Co}_3\text{O}_4$  nanoparticles.

S:Ni005c

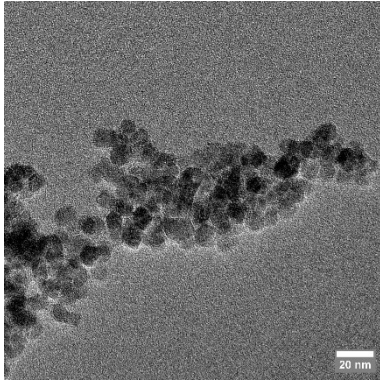

S:Ni01c

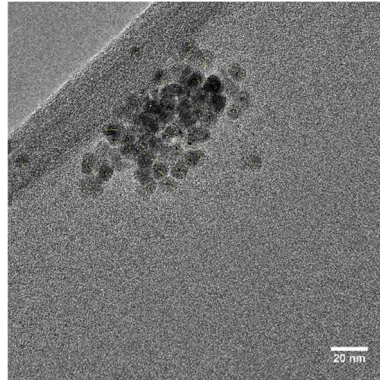

S:Ni02c

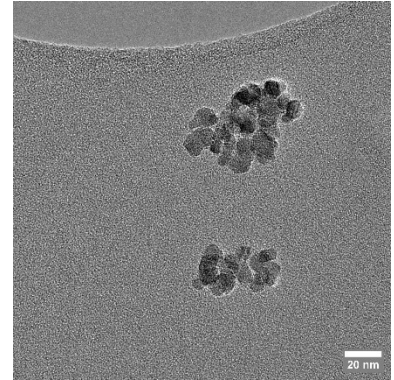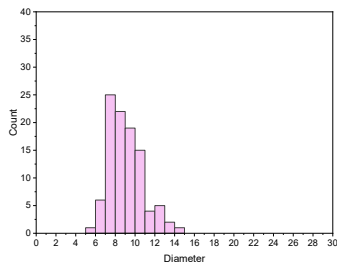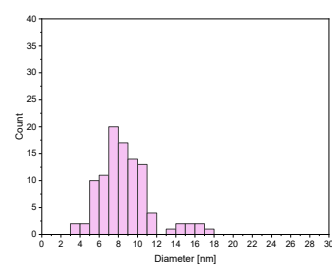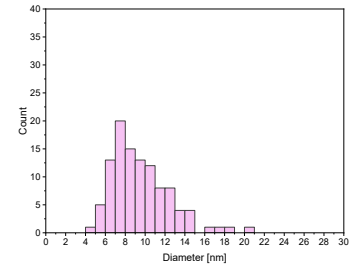

Figure S12. TEM images and particle size distribution of Ni-doped  $\text{Co}_3\text{O}_4$  nanoparticles.

## VI. EDX Characterization

**Table S3.** Metal concentration within the  $M_{0.05}Co_{2.95}O_4$ ,  $M_{0.1}Co_{2.9}O_4$  and  $M_{0.2}Co_{2.8}O_4$  ( $M = Al, V, Cr, Mn, Fe, Ni$ ) nanoparticle series determined by SEM-EDX bulk measurements.

|                    | <b>x = 0.05 [at%]</b> | <b>x = 0.1 [at%]</b> | <b>x = 0.2 [at%]</b> |
|--------------------|-----------------------|----------------------|----------------------|
| theoretical values | 1.7                   | 3.3                  | 6.7                  |
| $Al_xCo_{3-x}O_4$  | S:Al005c<br>1.7       | S:Al01c<br>3.2       | S:Al02c<br>6.5       |
| $V_xCo_{3-x}O_4$   | S:V005c<br>1.8        | S:V01c<br>3.3        | S:V02c<br>6.7        |
| $Cr_xCo_{3-x}O_4$  | S:Cr005c<br>1.8       | S:Cr01c<br>3.8       | S:Cr02c<br>7.3       |
| $Mn_xCo_{3-x}O_4$  | S:Mn005c<br>1.3       | S:Mn01c<br>3.6       | S:Mn02c<br>7.0       |
| $Fe_xCo_{3-x}O_4$  | S:Fe005c<br>1.5       | S:Fe01c<br>2.3       | S:Fe02c<br>5.5       |
| $Ni_xCo_{3-x}O_4$  | S:Ni005c<br>2.2       | S:Ni01c<br>3.2       | S:Ni02c<br>6.9       |

**Sample S:Al02c**

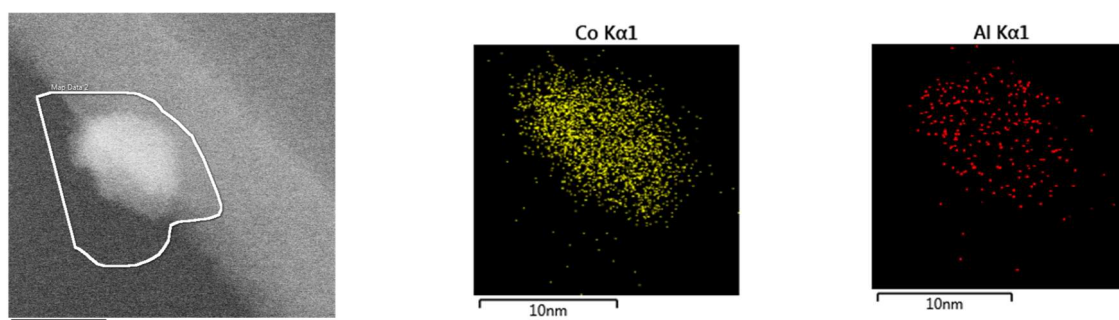

**Figure S13.** TEM-EDX Mapping of the Al-doped nanoparticle sample S:Al02c.

**Sample S:V02c**

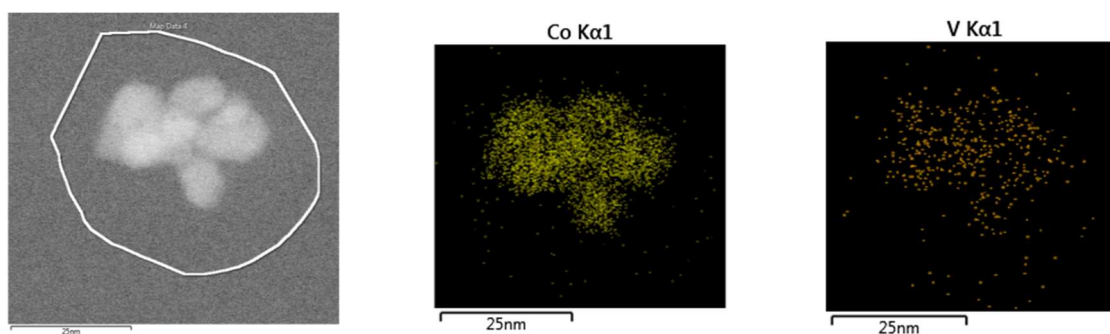

**Figure S14.** TEM-EDX Mapping of the V-doped nanoparticle sample S:V02c.



**Sample S:CrO2c**

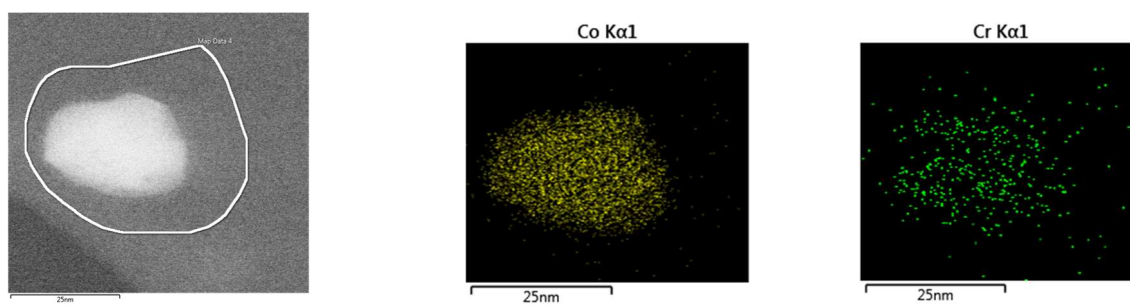

**Figure S15.** TEM-EDX Mapping of the Cr-doped nanoparticle sample S:CrO2c.

**Sample S:MnO2c**

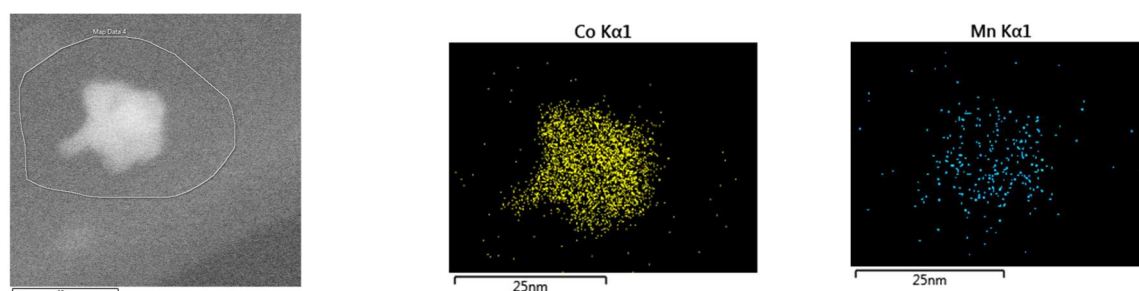

**Figure S16.** TEM-EDX Mapping of the Mn-doped nanoparticle sample S:MnO2c.

**Sample S:FeO2c**

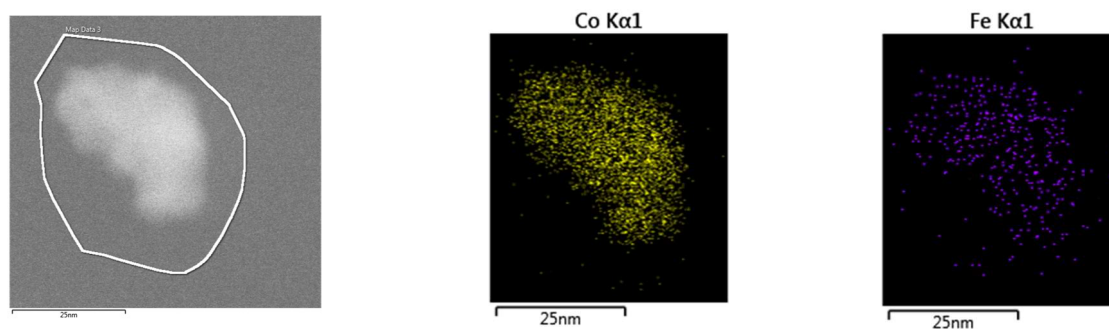

**Figure S17.** TEM-EDX Mapping of the Fe-doped nanoparticle sample S:FeO2c.

**Sample S:NiO2c**

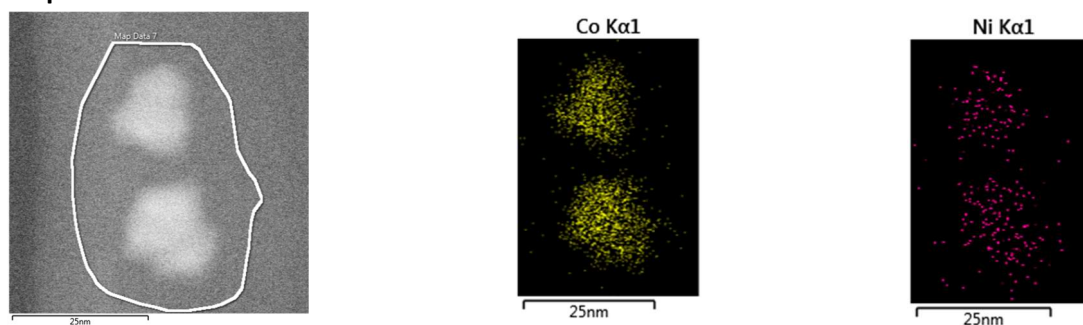

**Figure S18.** TEM-EDX Mapping of the Ni-doped nanoparticle sample S:NiO2c.

## VII. Mössbauer spectroscopy

Mössbauer spectra were recorded on the Fe-containing samples (S:Fe005c, S:Fe01c, S:Fe02c) in order to discern the valency of the Fe-ions, as well as to characterize their overall electronic and magnetic state. The focus was on sample S:Fe02c since its higher Fe-content provided the highest signal intensity from the three samples that were characterized. The room temperature (300 K) spectrum revealed a doublet structure, indicating that the sample is in a paramagnetic state. After evaluation via a fitting routine (Figure S20a) we were able to determine an isomer shift  $\delta$  of ca. 0.31 mm/s relative to  $\alpha$ -Fe at room temperature, and a quadrupole splitting  $\Delta E_Q$  of ca. 0.58 mm/s, indicating a high-spin  $\text{Fe}^{3+}$  state<sup>1</sup> with no  $\text{Fe}^{2+}$  being discernible within the detection limit, which usually exhibits far higher values of  $\delta$  and  $\Delta E_Q$ . A very slight asymmetry of the two lines could indicate a miniscule additional spectral contribution, which could not be resolved due to the overall low intensity.

At 5 K, the spectrum displays a magnetically ordered sextet state, which is to be expected due to the antiferromagnetic ordering in pure  $\text{Co}_3\text{O}_4$  up to the Néel temperature  $T_{\text{Néel}}$  of ca. 30 K.<sup>2,3</sup> Here, a non-Lorentzian line shape (reproduced by a narrow hyperfine field distribution) could indicate the presence of two subspectra in superposition, likely due to the distribution of  $\text{Fe}^{3+}$  on tetrahedral A-sites as well as octahedral B-sites. A broad sextet distribution is still present as a minor spectral component up to 80 K, indicating a slightly enhanced Néel temperature in S:Fe02c, matching trends in  $T_{\text{Néel}}$  for  $\text{Fe}_x\text{Co}_{3-x}\text{O}_4$  observed before.<sup>3</sup>

Due to the difficulties associated with the lower Fe content of samples S:Fe01c and S:Fe005c, only one spectrum was recorded at 80 K for each sample, to mitigate additional loss in spectral area by thermal excitation of phonons evident at higher temperatures. For these two, a pure paramagnetic doublet state is observed, consistent with lower values of  $T_{\text{Néel}}$  closer to 30 K.

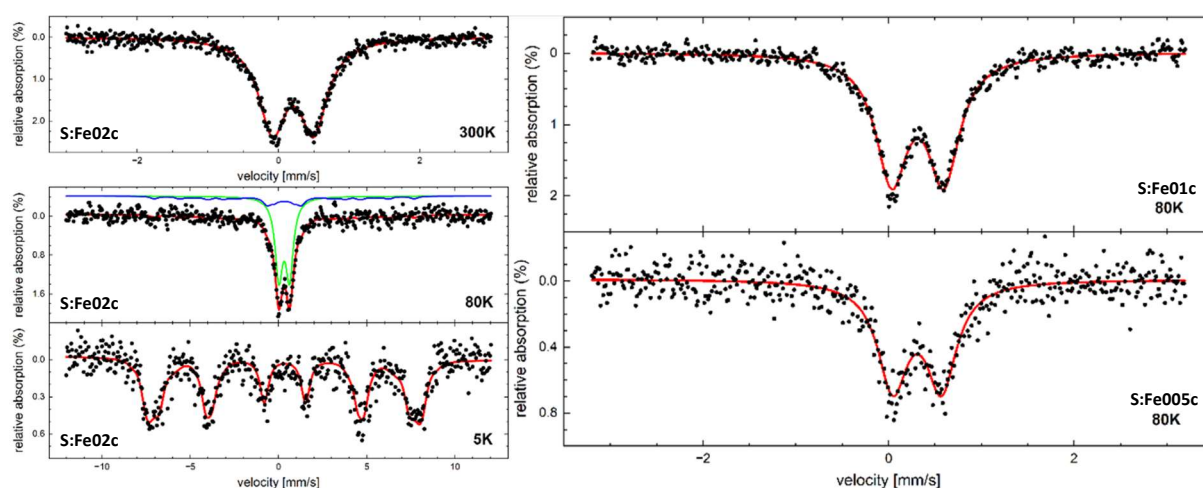

**Figure S19.** Mössbauer spectra of Fe-doped nanoparticles recorded between 5 and 300 K.

## VIII. Electrochemical Characterization

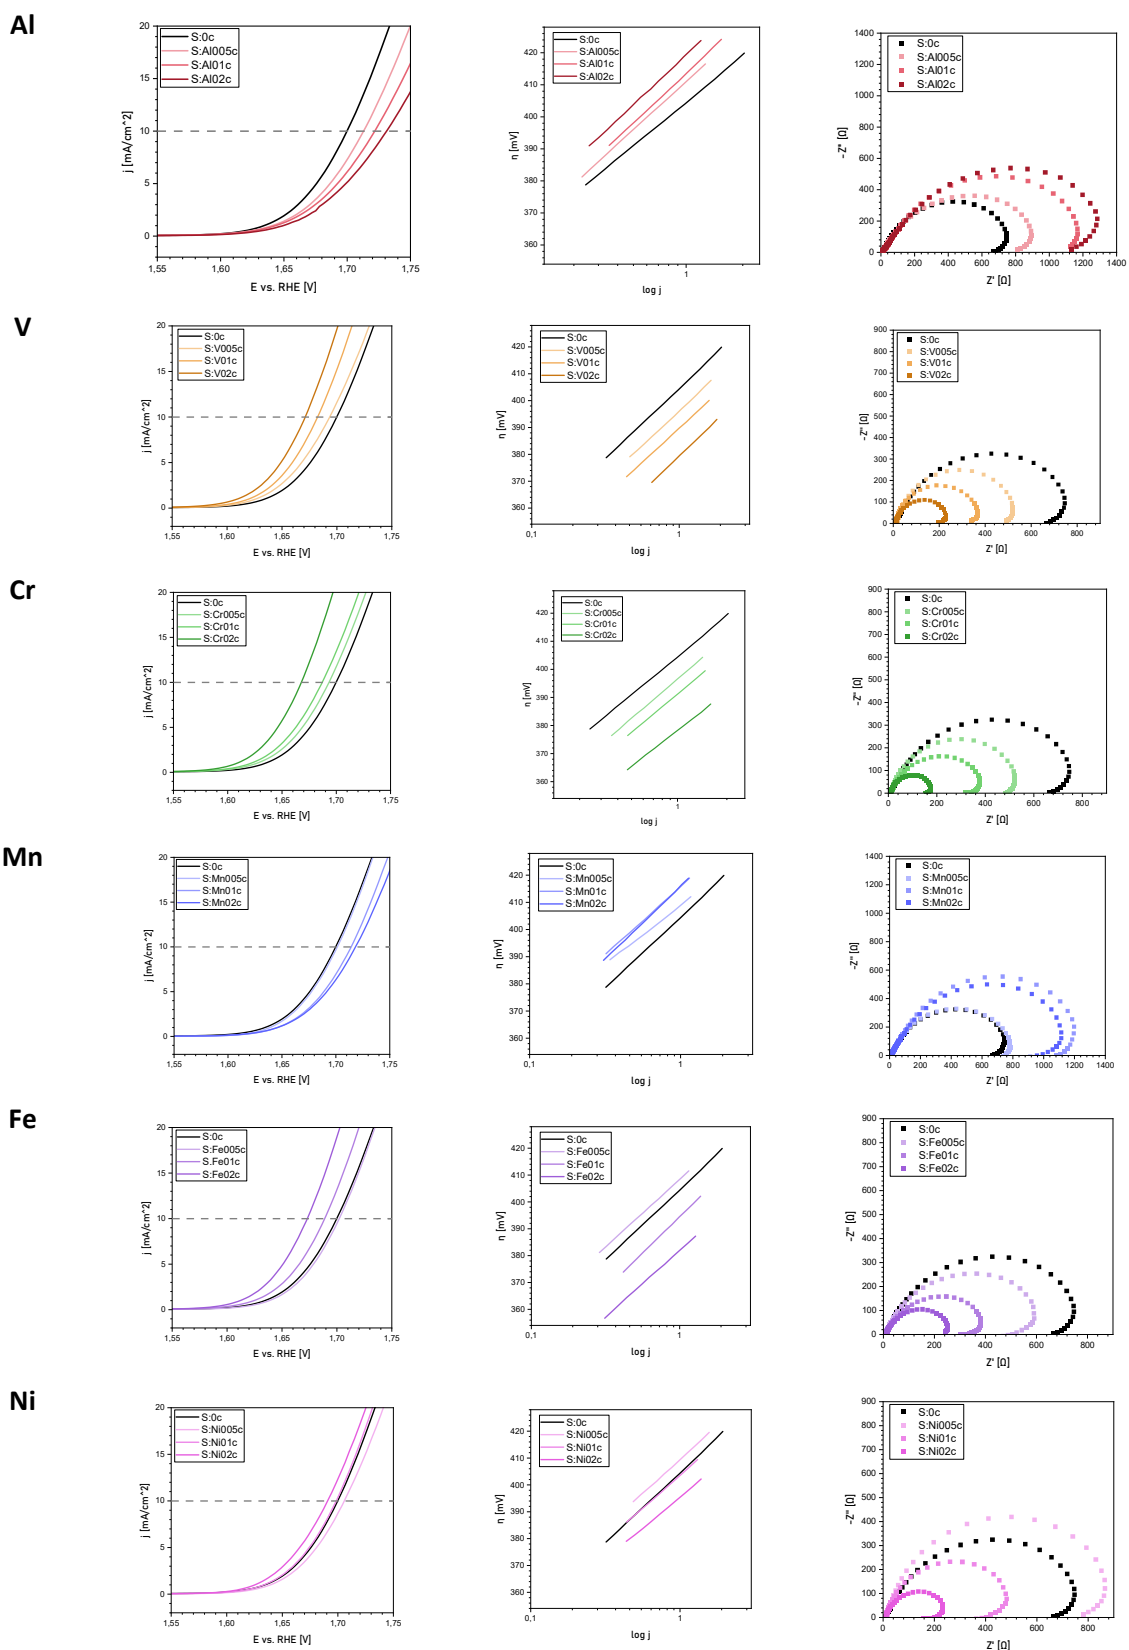

**Figure S20.** Electrochemical characterization of doped nanoparticles in comparison with pristine  $\text{Co}_3\text{O}_4$  using LSV measurements, Tafel slope and EIS measurements.



## IX. References

- 1 C. Gallenkamp, U. I. Kramm, J. Proppe and V. Krewald, *Int. J. Quantum Chem.*, 2021, 121:e26394.
- 2 Y. Ichiyanagi, Y. Kimishima and S. Yamada, *J. Magn. Magn. Mater.*, 2004, **272–276**, e1245.
- 3 M. Takahashi and M. E. Fine, *J. Appl. Phys.*, 1972, **43**, 4205.
